# Supplementary material
Source: publisher figshare collection journal article supplement (https://geolsoc.figshare.com/ndownloader/files/24182823)
Supplement: Supplementary file 1 [file 24182823]

	Na2O	MgO	Al2O3	SiO2	P2O5	K2O	CaO	TiO2	Fe2O3	MnO	LOI-Flux
molecular mass	61.98	40.32	101.96	60.09	189.94	94.2	56.08	79.9	159.69	60.94			Na	Mg	Al	Si	P	K	Ca	Ti	Fe	Mn	CIA-K	precip using CIA-K	CALMAG	Precip using CALMAG
	mass%	mass%	mass%	mass%	mass%	mass%	mass%	mass%	mass%	mass%	mass%	SUM
RRR16-001	0.052	0.644	1.353	56.875	0.036	0.205	21.120	0.083	0.256	0.255	19.00	99.88119	0.00083898	0.015972222	0.01326991	0.946496921	0.000189534	0.002176221	0.37660485	0.001038798	0.001603106	0.004184444	3.4	236.4	3.3	-361.6
RRR16-002	0.713	2.975	7.868	47.269	0.057	1.717	15.209	0.332	0.096	2.679	21.01	99.9264	0.011503711	0.073784722	0.077167517	0.786636712	0.000300095	0.018227176	0.271201854	0.004155194	0.000601165	0.043961273	21.4	337.3	18.3	-21.0
RRR16-003	0.319	1.733	2.540	54.586	0.039	0.572	19.867	0.134	0.145	0.509	19.49	99.93041	0.005146822	0.042981151	0.02491173	0.908404061	0.000205328	0.006072187	0.354261769	0.001677096	0.000908009	0.008352478	6.5	251.2	5.9	-301.9
RRR16-004	0.733	1.672	2.492	57.047	0.038	0.559	18.331	0.127	0.187	0.497	18.23	99.91392	0.011826396	0.041468254	0.024440957	0.949359294	0.000200063	0.005934183	0.326872325	0.001589487	0.001171019	0.008155563	6.7	252.4	6.2	-294.6
RRR16-005	0.895	2.457	5.759	64.832	0.056	1.245	9.176	0.279	0.092	1.644	13.45	99.88075	0.014440142	0.0609375	0.056482934	1.078914961	0.00029483	0.013216561	0.163623395	0.003491865	0.000576116	0.026977355	24.1	355.3	20.1	20.2
RRR16-006	0.887	3.412	6.617	61.338	0.052	1.460	8.729	0.317	0.084	2.111	14.89	99.89331	0.014311068	0.084623016	0.064897999	1.020768847	0.000273771	0.015498938	0.155652639	0.003967459	0.000526019	0.03464063	27.6	381.1	21.3	46.7
RRR16-007	0.725	7.519	6.542	45.290	0.056	1.347	13.049	0.300	0.254	1.480	23.30	99.86278	0.011697322	0.186483135	0.064162417	0.753702779	0.00029483	0.014299363	0.232685449	0.003754693	0.001590582	0.024286183	20.8	333.0	13.3	-134.6
RRR16-008	0.890	2.837	9.690	61.633	0.077	2.261	5.988	0.466	0.051	3.159	12.85	99.89842	0.014359471	0.070362103	0.09503727	1.025678149	0.000405391	0.024002123	0.106776034	0.00583229	0.000319369	0.051837873	44.0	525.7	34.9	356.5
RRR16-009	0.786	7.828	7.996	46.326	0.070	1.727	11.980	0.344	0.320	2.145	20.19	99.71416	0.01268151	0.194146825	0.078422911	0.770943585	0.000368537	0.018333333	0.213623395	0.004305382	0.002003883	0.035198556	25.7	367.1	16.1	-69.8
RRR16-010	0.673	6.311	4.876	27.701	0.052	1.077	25.508	0.199	0.296	1.168	32.02	99.88149	0.010858341	0.156522817	0.047822676	0.460991846	0.000273771	0.011433121	0.454850214	0.002490613	0.001853591	0.019166393	9.3	265.6	7.3	-271.2
RRR16-011	0.986	3.713	10.169	49.728	0.065	2.411	10.246	0.450	0.086	3.901	18.15	99.90866	0.015908358	0.092088294	0.09973519	0.827558662	0.000342213	0.02559448	0.182703281	0.00563204	0.000538543	0.064013784	33.4	427.2	26.6	168.4
RRR16-012	1.168	3.905	8.649	50.539	0.063	1.969	11.733	0.391	0.119	2.944	18.43	99.91373	0.018844789	0.096850198	0.084827383	0.841055084	0.000331684	0.020902335	0.209218973	0.004893617	0.000745194	0.048309813	27.1	377.2	21.7	56.6
RRR16-013	0.957	2.849	9.349	50.578	0.062	2.288	12.256	0.428	0.076	3.288	17.78	99.90779	0.015440465	0.070659722	0.091692821	0.841704111	0.000326419	0.024288747	0.218544936	0.005356696	0.000475922	0.05395471	28.2	385.0	24.1	110.4
RRR16-014	1.171	3.070	10.049	65.047	0.078	2.231	3.942	0.446	0.051	2.338	11.49	99.90822	0.018893191	0.076140873	0.098558258	1.082492927	0.000410656	0.023683652	0.070292439	0.005581977	0.000319369	0.038365606	52.5	621.9	40.2	477.0
RRR16-015	0.416	5.751	3.909	35.925	0.038	0.771	23.433	0.156	0.181	1.276	28.06	99.91226	0.006711843	0.142633929	0.038338564	0.59785322	0.000200063	0.008184713	0.417849501	0.001952441	0.001133446	0.020938628	8.3	260.3	6.4	-290.5
RRR16-016	1.075	2.877	12.934	59.178	0.078	3.040	2.664	0.542	0.035	4.683	12.83	99.93351	0.017344305	0.071354167	0.126853668	0.984822766	0.000410656	0.032271762	0.047503566	0.006783479	0.000219175	0.076846078	66.2	814.2	51.6	735.6
RRR16-017	0.616	1.327	5.464	50.226	0.046	1.168	18.958	0.246	0.149	1.268	20.42	99.88932	0.00993869	0.032911706	0.053589643	0.835846231	0.000242182	0.012399151	0.338052782	0.003078849	0.000933058	0.020807351	13.3	287.6	12.6	-149.4
RRR16-018	1.055	2.746	13.649	62.275	0.061	3.135	0.478	0.510	0.036	4.960	11.02	99.92463	0.01702162	0.068105159	0.133866222	1.036362123	0.000321154	0.033280255	0.008523538	0.006382979	0.000225437	0.081391533	84.0	1156.2	63.6	1007.2
RRR16-019	1.036	2.743	13.450	60.542	0.067	2.982	1.561	0.498	0.031	4.920	12.10	99.93495	0.016715069	0.068030754	0.131914476	1.00752205	0.000352743	0.031656051	0.027835235	0.006232791	0.000194126	0.080735149	74.8	964.2	57.9	878.2
RRR16-020	0.259	15.958	2.445	16.330	0.035	0.385	24.413	0.070	0.282	0.805	38.73	99.70787	0.004178767	0.39578373	0.023979992	0.271759028	0.000184269	0.004087049	0.435324536	0.000876095	0.001765921	0.013209714	5.2	244.8	2.8	-372.2
RRR16-021	0.960	2.572	11.951	62.646	0.065	2.213	2.429	0.458	0.034	4.540	12.07	99.93406	0.015488867	0.063789683	0.117212632	1.042536196	0.000342213	0.023492569	0.043313124	0.005732165	0.000212913	0.074499508	66.6	821.0	52.3	749.8
RRR16-022	1.012	2.426	11.772	63.972	0.069	2.424	2.571	0.480	0.029	4.244	10.93	99.92856	0.016327848	0.060168651	0.115457042	1.064603095	0.000363273	0.025732484	0.045845221	0.006007509	0.000181602	0.069642271	65.0	795.6	52.1	747.1
RRR16-023	1.047	3.216	14.442	61.167	0.102	3.228	0.441	0.545	0.030	4.187	11.49	99.89696	0.016892546	0.079761905	0.141643782	1.017923115	0.000537012	0.034267516	0.007863766	0.006821026	0.000187864	0.068706925	85.1	1182.7	61.8	966.0
RRR16-024	1.279	2.942	13.481	63.818	0.085	3.033	0.436	0.522	0.033	3.879	10.40	99.90597	0.020635689	0.07296627	0.132218517	1.062040273	0.00044751	0.032197452	0.007774608	0.006533166	0.00020665	0.063652773	82.3	1119.0	62.1	972.9
RRR16-025	0.516	1.532	5.590	27.145	0.057	1.193	31.783	0.169	0.308	1.328	30.29	99.91282	0.008325266	0.037996032	0.054825422	0.451739058	0.000300095	0.012664544	0.566743937	0.002115144	0.001928737	0.021791926	8.7	262.5	8.3	-247.2
RRR16-026	1.292	3.071	14.721	52.821	0.109	3.645	4.212	0.544	0.049	5.104	14.34	99.9115	0.020845434	0.076165675	0.144380149	0.879031453	0.000573865	0.038694268	0.07510699	0.006808511	0.000306845	0.083754513	60.1	722.1	48.8	672.3
RRR16-027	0.644	2.760	12.406	48.560	0.093	2.859	11.861	0.460	0.063	2.984	17.22	99.91366	0.010390449	0.068452381	0.121675167	0.808121152	0.000489628	0.030350318	0.211501427	0.005757196	0.000394514	0.048966196	35.4	444.2	30.3	251.6
RRR16-028	0.093	9.854	2.650	23.961	0.032	0.464	26.889	0.085	0.423	1.046	34.25	99.75076	0.001500484	0.244394841	0.025990585	0.398751872	0.000168474	0.00492569	0.479475749	0.00106383	0.002648882	0.017164424	5.1	244.6	3.5	-357.2
RRR16-029	1.203	3.090	15.475	59.208	0.053	3.547	0.401	0.563	0.029	3.678	12.68	99.92502	0.019409487	0.076636905	0.151775206	0.985322017	0.000279035	0.037653928	0.007150499	0.007046308	0.000181602	0.060354447	85.1	1182.3	64.4	1026.1
RRR16-030	1.173	3.191	15.456	57.436	0.060	3.757	0.194	0.540	0.030	5.924	12.17	99.93413	0.01892546	0.079141865	0.151588858	0.955832917	0.000315889	0.039883227	0.003459344	0.006758448	0.000187864	0.097210371	87.1	1230.5	64.7	1032.9
RRR16-031	0.892	3.131	15.639	57.030	0.065	3.864	0.398	0.542	0.031	6.198	12.13	99.91787	0.014391739	0.07765377	0.15338368	0.949076385	0.000342213	0.041019108	0.007097004	0.006783479	0.000194126	0.101706597	87.7	1244.6	64.4	1025.7
RRR16-032	0.686	2.983	14.824	58.151	0.039	3.623	0.393	0.511	0.031	6.140	12.55	99.92641	0.011068086	0.073983135	0.145390349	0.967731736	0.000205328	0.038460722	0.007007846	0.006395494	0.000194126	0.100754841	88.9	1275.1	64.2	1021.4
RRR16-033	0.989	3.000	14.823	58.613	0.040	3.686	0.363	0.522	0.031	5.641	12.22	99.93094	0.01595676	0.074404762	0.145380541	0.975420203	0.000210593	0.039129512	0.006472896	0.006533166	0.000194126	0.092566459	86.6	1218.4	64.3	1022.1
RRR16-034	0.858	2.887	13.894	60.239	0.037	3.329	0.383	0.488	0.031	5.444	12.34	99.9321	0.013843175	0.071602183	0.136269125	1.002479614	0.000194798	0.035339703	0.006829529	0.006107635	0.000194126	0.089333771	86.8	1223.1	63.5	1004.3
RRR16-035	1.222	3.059	13.936	60.451	0.033	3.257	0.145	0.483	0.029	4.936	12.39	99.93617	0.019716037	0.075868056	0.136681051	1.006007655	0.000173739	0.034575372	0.002585592	0.006045056	0.000181602	0.080997703	86.0	1202.6	63.5	1005.8
RRR16-036	1.157	3.118	15.313	58.389	0.037	3.471	0.171	0.532	0.030	4.738	12.98	99.9343	0.018667312	0.077331349	0.150186348	0.971692461	0.000194798	0.036847134	0.003049215	0.006658323	0.000187864	0.077748605	87.4	1236.1	65.1	1042.2
RRR16-037	0.978	3.954	13.888	57.419	0.037	2.912	2.106	0.490	0.040	3.231	14.85	99.9098	0.015779284	0.098065476	0.136210279	0.955550008	0.000194798	0.030912951	0.037553495	0.006132666	0.000250485	0.053019363	71.9	910.8	50.1	701.2
RRR16-038	0.255	1.726	5.366	29.262	0.054	1.088	30.672	0.170	0.165	1.868	29.28	99.91006	0.00411423	0.04280754	0.052628482	0.486969546	0.0002843	0.011549894	0.546932953	0.00212766	0.001033252	0.030653101	8.7	262.5	8.2	-249.9
RRR16-039	0.630	2.501	12.530	63.637	0.075	2.854	1.199	0.450	0.027	5.192	10.80	99.89347	0.010164569	0.06202877	0.12289133	1.059028124	0.000394862	0.03029724	0.021380171	0.00563204	0.000169078	0.085198556	79.6	1060.2	59.6	915.8
RRR16-040	0.120	0.911	2.418	38.089	0.038	0.427	30.174	0.059	0.100	0.766	26.80	99.8986	0.001936108	0.022594246	0.023715182	0.633865868	0.000200063	0.004532909	0.538052782	0.000738423	0.000626213	0.012569741	4.2	240.2	4.1	-343.7
RRR16-041	0.699	2.604	12.702	64.733	0.041	2.827	0.507	0.357	0.025	4.597	10.84	99.93375	0.011277832	0.064583333	0.124578266	1.077267432	0.000215858	0.030010616	0.009040656	0.004468085	0.000156553	0.075434854	86.0	1202.8	62.9	990.4
RRR16-042	0.659	3.025	14.744	61.627	0.104	3.119	0.807	0.431	0.026	3.492	11.89	99.92024	0.010632462	0.075024802	0.144605728	1.025578299	0.000547541	0.033110403	0.014390157	0.005394243	0.000162815	0.057302265	85.2	1185.6	61.8	966.3
RRR16-043	0.755	2.735	14.304	62.301	0.054	2.963	0.851	0.435	0.024	3.652	11.82	99.89656	0.012181349	0.067832341	0.14029031	1.036794808	0.0002843	0.031454352	0.01517475	0.005444305	0.000150291	0.059927798	83.7	1149.6	62.8	989.7
RRR16-044	1.094	3.403	13.963	62.843	0.047	1.847	1.052	0.445	0.022	3.665	11.51	99.88752	0.017650855	0.084399802	0.136945861	1.045814611	0.000247447	0.019607219	0.018758916	0.005569462	0.000137767	0.060141122	79.0	1048.2	57.0	858.3
RRR16-045	1.051	3.101	14.771	61.521	0.039	2.102	1.194	0.441	0.022	3.793	11.85	99.88759	0.016957083	0.076909722	0.144870537	1.023814279	0.000205328	0.022314225	0.021291013	0.005519399	0.000137767	0.062241549	79.1	1050.6	59.6	916.5
RRR16-046	1.121	3.110	14.895	61.461	0.041	2.252	0.987	0.442	0.022	3.268	12.32	99.91456	0.01808648	0.077132937	0.146086701	1.022815776	0.000215858	0.023906582	0.017599857	0.005531915	0.000137767	0.053626518	80.4	1076.9	60.7	940.6
RRR16-047	0.782	3.146	13.540	63.145	0.042	1.860	1.192	0.435	0.023	3.618	12.10	99.88078	0.012616973	0.078025794	0.132797175	1.050840406	0.000221122	0.019745223	0.02125535	0.005444305	0.000144029	0.059369872	79.7	1062.4	57.2	862.5
RRR16-048	0.591	3.020	13.183	64.731	0.047	2.250	0.850	0.491	0.024	4.335	10.38	99.90123	0.009535334	0.074900794	0.129295802	1.077234149	0.000247447	0.02388535	0.015156919	0.006145181	0.000150291	0.071135543	84.0	1156.0	58.9	901.6
RRR16-049	0.516	3.598	11.285	67.917	0.042	1.540	0.817	0.394	0.044	4.750	9.01	99.915833	0.008325266	0.089236111	0.110680659	1.130254618	0.000221122	0.016348195	0.014568474	0.004931164	0.000275534	0.07794552	82.9	1131.1	51.6	735.1
RRR16-050	0.507	2.938	14.169	61.499	0.040	1.486	1.576	0.403	0.022	3.297	13.98	99.9133	0.008180058	0.072867063	0.138966261	1.023448161	0.000210593	0.015774947	0.02810271	0.005043805	0.000137767	0.054102396	79.3	1054.4	57.9	878.4
RRR16-051	0.444	2.435	13.736	65.043	0.078	1.615	1.460	0.433	0.027	2.613	12.03	99.91647	0.007163601	0.060391865	0.134719498	1.08242636	0.000410656	0.017144374	0.026034237	0.005419274	0.000169078	0.042878241	80.2	1074.0	60.9	946.5
